# Supplementary material for: On Deep Landscape Exploration of COVID-19 Patients Cells and Severity Markers
Source: Front Immunol. 2021 Sep 16;12:705646. doi: 10.3389/fimmu.2021.705646 (PMC8481922; doi:10.3389/fimmu.2021.705646)
Supplement: Supplementary file 2 [file Table_1.xlsx]

## Sheet: Sheet1
Table S1. Markers genes used to assign clusters with specific phenotype. Six cell types were found and a group of cells with an uncertain cell type assignment.
Ephitelial	Monocytes	Macrophages	NK	Dendritic	T	B	Neutrophils
TPPP3	CD14	CD163	GNLY	CCL20	CD8A	MS4A1	HSPA6
KRT19	APOBEC3A	SPP1	NKG7	LAMP3	CD8B	IGKC	CSF3R
KRT8		FABP4	KLRB1		GZMH	CD79A
KRT18		CCL18	KLRD1		GZMK	IGHA1
		IL1R2	FASLG		LTB	IGHG3
		CXCL3	KIR2DL4		CTLA4	IGHM
		CCL7			IL2RA	PTPRCAP
					TNFRSF4	TNFRSF17
					IL7R
					FOXP3
					CD40LG
					CD70
